# Supplementary material
Source: PubMed Central journal article supplement (PMC7567982)
Supplement: mmc1.pdf [file mmc1.pdf]

**Biophysical Journal, Volume 118**

**Supplemental Information**

**Platelet Factor 4 Interactions with Short Heparin Oligomers: Implications for Folding and Assembly**

**Chendi Niu, Yang Yang, Angela Huynh, Ishac Nazy, and Igor A. Kaltashov**

Supporting Material for

**Platelet factor 4 interactions with short heparin oligomers:  
implications for folding and assembly**

Running title: ***Polyanion-assisted folding and assembly of PF4***

Authors: C. Niu <sup>1</sup>, Y. Yang <sup>1</sup>, A. Huynh <sup>2</sup>, I. Nazy <sup>2</sup> and I.A. Kaltashov <sup>1,\*</sup>

<sup>1</sup>Chemistry Department, University of Massachusetts-Amherst, 240 Thatcher Way, Amherst, MA 01003, United States and <sup>2</sup>Department of Medicine, McMaster University, 1280 Main St., Hamilton, ON, Canada.

\*Corresponding author email: [kaltashov@chem.umass.edu](mailto:kaltashov@chem.umass.edu)

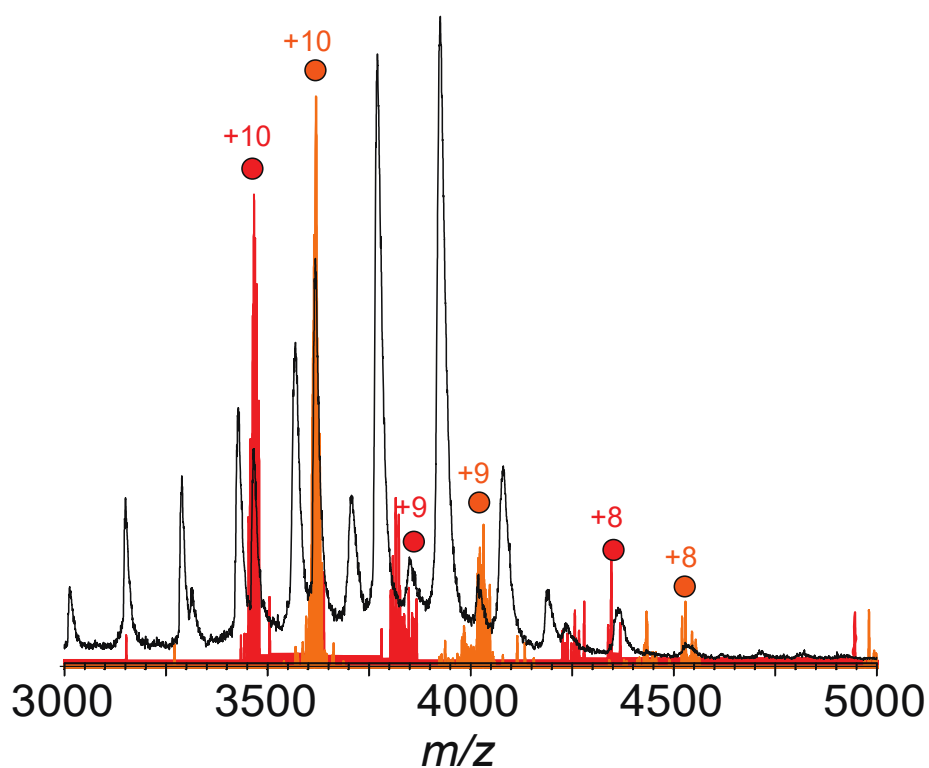

**Figure S1.** Charge/mass assignment for high- $m/z$  ions in the mass spectrum of PF4/pS mixture using limited charge reduction.

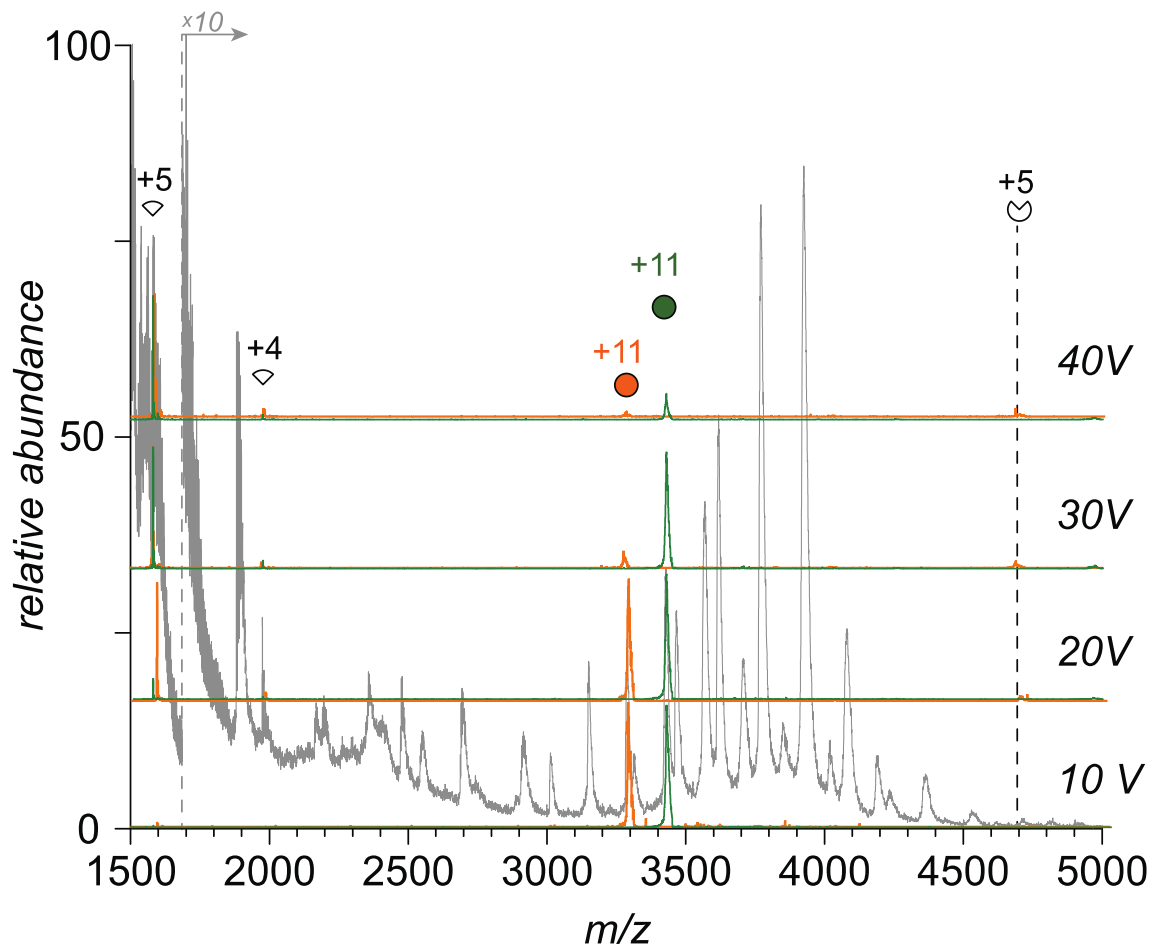

**Figure S2.** Mass spectra of fragment ions generated upon collision-induced dissociation of  $M_4 \cdot pS_n^{z+}$  ions at different collisional energies as indicated on the graph. The black trace shows a reference mass spectrum (MS1) of the PF4/pS mixture, from which the precursor ions were generated.

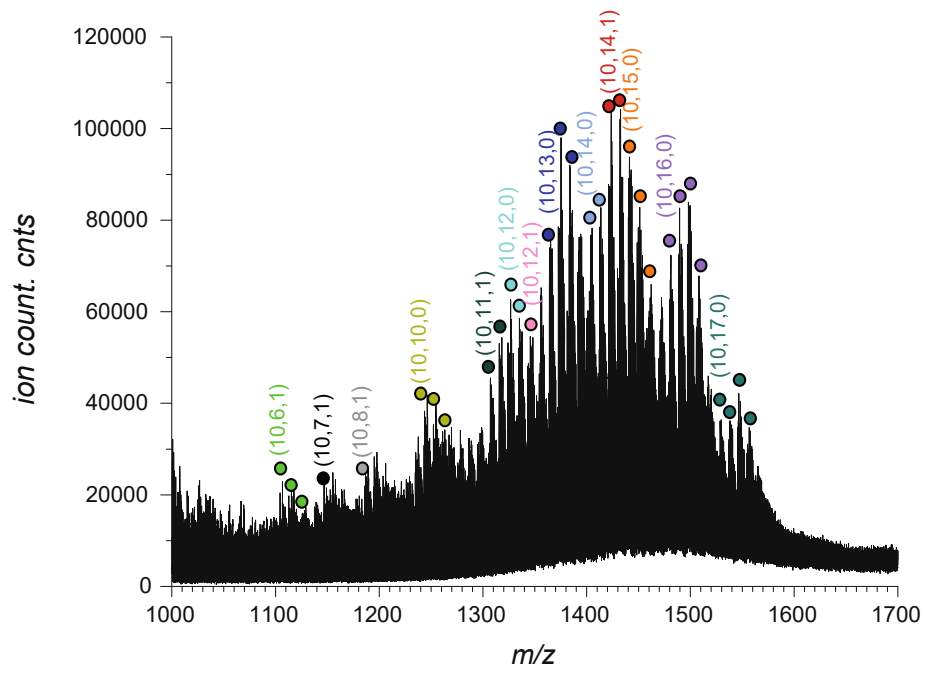

**Figure S3.** Mass Spectrum of a 0.02 mg/mL aqueous solution of dp10 acquired in the positive ion mode.
